# Supplementary material for: Low expression of G protein-coupled oestrogen receptor 1 (GPER) is associated with adverse survival of breast cancer patients
Source: PubMed Central journal article supplement (PMC5995224; doi:10.18632/oncotarget.25408), 2018-05-25
Supplement: oncotarget-09-25946-s001.pdf [file oncotarget-09-25946-s001.pdf]

## Low expression of G protein-coupled oestrogen receptor 1 (GPER) is associated with adverse survival of breast cancer patients

### SUPPLEMENTARY MATERIALS

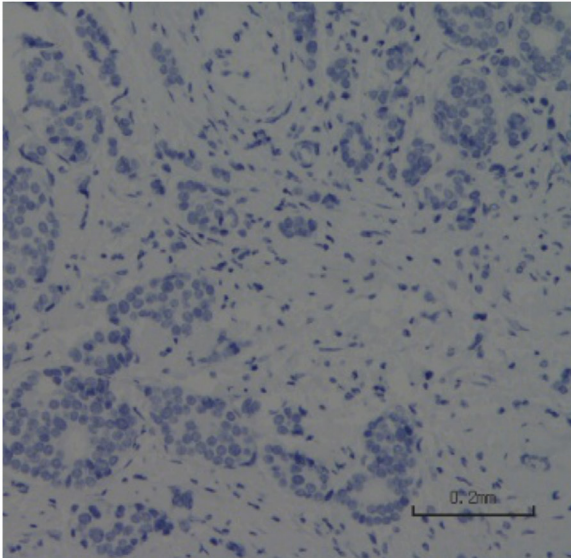

Negative control

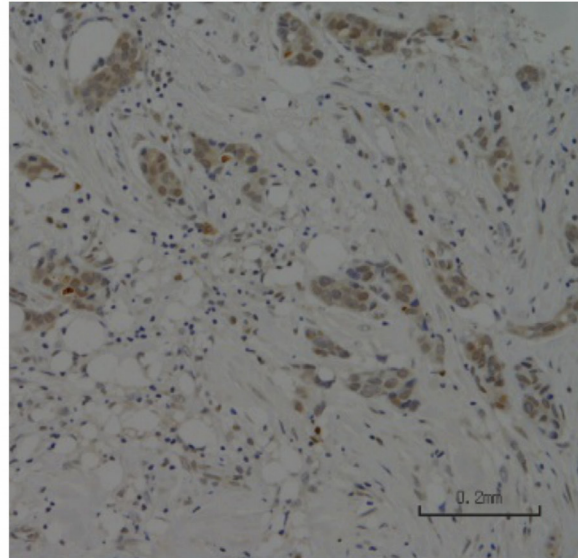

Positive control

Supplementary Figure 1: Photomicrographs following immunohistochemical staining of positive and negative controls in breast cancer specimens used during GPER staining experiments.
